# Supplementary material for: Genetic characterization of dilated cardiomyopathy patients undergoing heart transplantation in the Chinese population by whole-exome sequencing
Source: Springer Nature journal article supplement (doi:10.1186/s12967-023-04282-5), 2023-07-17

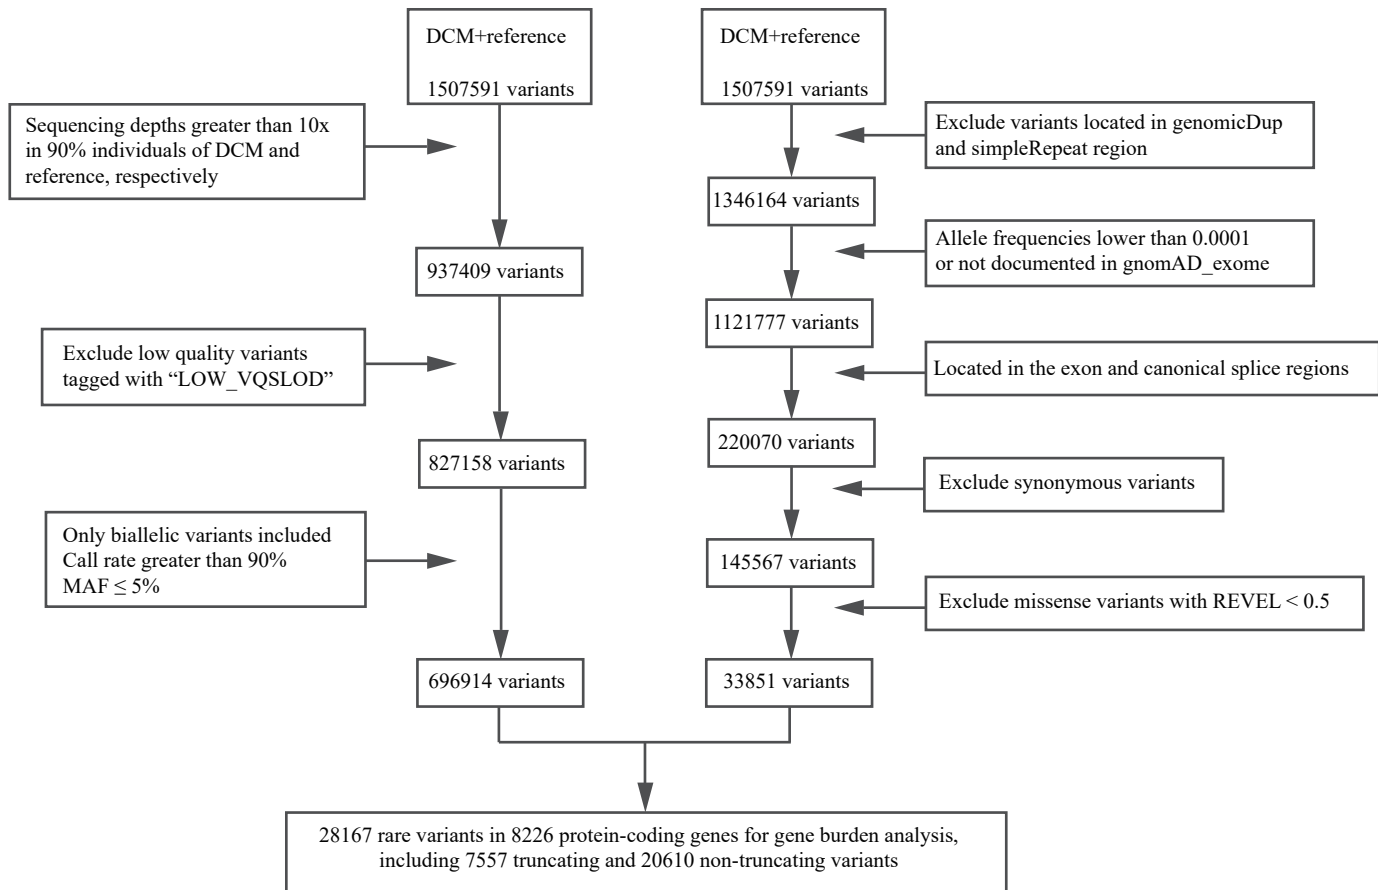

Supplement: MOESM2 [file 25809232]
