# Supplementary material for: Genetic characterization of dilated cardiomyopathy patients undergoing heart transplantation in the Chinese population by whole-exome sequencing
Source: J Transl Med. 2023 Jul 17;21:476. doi: 10.1186/s12967-023-04282-5 (PMC10351148; doi:10.1186/s12967-023-04282-5)
Supplement: Supplementary file 3 — Additional file 3: Table S1. Quality control statistics for sequencing. DCM, dilated cardiomyopathy; Q20, percentage of bases with a Phred score greater than 20 to the total bases; Q30, percentage of bases with a Phred score greater than 30 to the total bases. Table S2. The number of variants carried by each DCM patient before and after filtering. DCM, dilated cardiomyopathy. Table S3. Rare variants in high evidence genes identified in the Fuwai DCM HTx cohort. One TTN variant (NM_133379:exon46:c.C12949T:p.Q4317X) was predicted to be VUS since it affects only the Novex-3 isoform. Bold PMID represents the paper focused on the HTx patients. ACMG/AMP, American College of Medical Genetics and Genomics and the Association for Molecular Pathology; ACTC1, actin alpha cardiac muscle 1; ACTN2, actinin alpha 2; B, benign; BAG3, BAG cochaperone 3; DCM, dilated cardiomyopathy; DES, desmin; DSP, desmoplakin; FLNC, filamin C; HTx, heart transplantation; JPH2, junctophilin 2; LB, likely benign; LMNA, lamin A/C; LP, likely pathogenic; MYH7, myosin heavy chain 7; NEXN, nexilin F-actin binding protein; P, pathogenic; PLN, phospholamban; RBM20, RNA binding motif protein 20; SCN5A, sodium voltage-gated channel alpha subunit 5; TNNT2, troponin T2, cardiac type; TTN, titin; VUS, variant of unknown significance. Table S4. The clinical characterization of DCM in relation to P/LP variant status. Continuous variables are expressed as the mean ± SD values, and all categorical variables are depicted using relative frequency distributions. Disease course: months from symptom onset to heart transplantation. AF, atrial fibrillation; BAG3, BAG cochaperone 3; BMI, body mass index; DCM, dilated cardiomyopathy; FLNC, filamin C; IVS, interventricular septum; LAD, left atrial diameter; LMNA, lamin A/C; LP, likely pathogenic; LVEDD, left ventricular end-diastolic dimension; LVEF, left ventricular ejection fraction; NYHA, New York Heart Association classification; P, pathogenic; RVD, right ventricle diam [file 12967_2023_4282_MOESM3_ESM.xls]

## Sheet: Table S1
Table S1 Quality control statistics for sequencing.
DCM patient ID	Size of raw data(G)	Number of raw reads pair	Raw depth(x)	Average sequencing error rate	Q20	Q30	Number of clean reads	Average sequencing depth on target(x)	Number of mapped reads	Mapping rate
1	12.25	40849254	243.1	0.04	95.13	89.21	78456970	146.92	78299793	0.997997
2	13.5	45015572	267.91	0.03	96.06	90.8	86788498	165.32	86678468	0.998732
3	14.46	48187240	286.96	0.06	93.73	84.86	93092924	177.23	92900428	0.997932
4	11.05	36818634	219.29	0.04	92.99	83.73	71635066	133.52	71612787	0.999689
5	12.16	40523261	241.31	0.03	95.39	89.72	80046626	147.7	79852742	0.997578
6	11.43	38114675	226.83	0.04	94.91	88.81	73534620	135.62	73394530	0.998095
7	10.86	36194608	215.52	0.07	92.56	82.58	69832364	134.45	69830007	0.999966
8	13.42	44727617	266.32	0.07	90.74	81.24	87372980	159.91	86866761	0.994206
9	10.98	36585251	217.9	0.05	93.53	86.66	70632170	128.85	70359241	0.996136
10	13.7	45655780	271.88	0.06	93.28	84.29	89076504	163.46	88864116	0.997616
11	11.56	38540581	229.41	0.03	95.08	89.41	76014114	141.96	75711599	0.99602
12	14.12	47068379	280.21	0.03	94.97	89.26	93339318	173.99	92948560	0.995814
13	13.32	44407072	264.34	0.04	95.11	89.22	87658622	167.68	87409827	0.997162
14	14.2	47349361	281.8	0.03	96.01	90.86	93224810	175.26	93066940	0.998307
15	13.38	44615950	265.53	0.04	95.16	89.34	88197182	167.46	87931913	0.996992
16	13.91	46382506	276.04	0.06	93.44	84.59	90572662	166.96	90372561	0.997791
17	14.75	49177690	292.71	0.03	95.72	90.29	97255126	185.8	97053727	0.997929
18	12.37	41231819	245.48	0.03	96.11	91.1	81188900	153.61	81059710	0.998409
19	11.7	39014033	232.19	0.07	92.63	82.97	76922052	146.78	76889121	0.999572
20	14.34	47793918	284.58	0.07	91.76	82.52	93045964	170.16	92654289	0.995791
21	15.98	53275950	317.12	0.03	96.04	90.95	104998602	199.91	104815101	0.998252
22	12.16	40548423	241.31	0.08	90.75	80.91	79367516	140.01	78961559	0.994885
23	12.57	41894796	249.45	0.06	93.65	85	81351514	151.55	81163285	0.997686
24	15.18	50602867	301.25	0.07	91.78	83.25	99763998	185.97	99244584	0.994794
25	11.35	37834202	225.24	0.05	93.47	85.73	74636252	139.39	74423716	0.997152
26	13.66	45517220	271.08	0.05	93.66	86.09	89904044	169	89680367	0.997512
27	11.47	38241828	227.62	0.05	92.86	83.51	74160932	137.89	74141169	0.999734
28	12.74	42465901	252.82	0.06	93.8	85.19	82957552	156.19	82791838	0.998002
29	11.58	38595822	229.8	0.07	91.84	82.89	75156556	136.53	74875524	0.996261
30	14.16	47209847	281	0.05	93.87	86.41	93005748	175.19	92748858	0.997238
31	12.42	41386774	246.47	0.03	95.67	90.27	81644694	153.07	81438250	0.997471
32	11.29	37628543	224.05	0.05	94.38	87.22	72120698	132.65	71807249	0.995654
33	13.13	43761226	260.56	0.06	94.13	85.66	85269994	159.18	85118158	0.998219
34	14.91	49714838	295.89	0.03	95.87	90.62	97984410	187.52	97790348	0.998019
35	10.48	34941902	207.98	0.03	96.02	90.91	68781102	132.09	68660412	0.998245
36	10.87	36233523	215.71	0.05	93.66	86.16	70644936	124.76	70275858	0.994776
37	12.71	42368625	252.23	0.07	93.03	84	83860586	159.15	83819106	0.999505
38	11.27	37564659	223.65	0.07	93.02	83.58	73363526	131.25	73191003	0.997648
39	11.72	39080099	232.58	0.04	95.07	89.11	75785154	139.66	75651657	0.998238
40	11.53	38436337	228.81	0.03	95.68	90.31	75537892	141.23	75385495	0.997983
41	12.49	41647558	247.86	0.03	95.58	90.12	82402346	152.99	82187951	0.997398
42	12.51	41697957	248.26	0.07	92.33	82.71	81544036	147.09	81315207	0.997194
43	10.54	35141151	209.17	0.03	96.34	91.25	68327456	129.22	68261563	0.999036
44	16.93	56419731	335.98	0.03	95.58	90.25	111254288	211.76	110923296	0.997025
45	13.36	44538748	265.13	0.04	94.93	88.91	85838282	161.48	85638778	0.997676
46	12.6	41996504	250.05	0.03	95.75	90.4	82150146	157.93	81957473	0.997655
47	12.31	41040568	244.29	0.04	94.71	88.53	80028888	149.04	79840050	0.99764
48	11.94	39798146	236.95	0.03	95.43	90.02	78729622	144.06	78469485	0.996696
49	11.56	38533905	229.41	0.05	93.58	86.03	75828058	143.94	75625290	0.997326
50	11.66	38871961	231.39	0.03	95.94	90.76	75910664	148.12	75754354	0.997941
51	11.92	39749360	236.55	0.04	94.57	88.28	77293824	145.08	77101134	0.997507
52	10.16	33870903	201.62	0.04	95.28	89.58	66879408	125.73	66695594	0.997252
53	14.17	47231603	281.2	0.03	96.28	91.36	93244004	178.15	93113554	0.998601
54	12.85	42842776	255.01	0.03	95.72	90.35	83125856	162.9	82939729	0.997761
55	17.63	58772058	349.87	0.07	92.86	83.56	114345542	203.28	114079504	0.997673
56	14.11	47029315	280.01	0.03	96	90.68	90846426	171.5	90744576	0.998879
57	14.46	48191829	286.96	0.07	93.17	84.16	93448728	169.85	93219186	0.997544
58	12.92	43058838	256.4	0.03	95.88	90.69	85241944	157.4	85087371	0.998187
59	10.39	34621289	206.19	0.03	95.64	90.25	68318348	130.57	68140252	0.997393
60	10.76	35854618	213.53	0.04	95.28	89.42	70014800	126.71	69906620	0.998455
61	11.64	38811606	231	0.06	93.44	84.39	75552408	137.15	75386082	0.997799
62	14.81	49358608	293.9	0.06	93.68	84.94	95695020	175.13	95505253	0.998017
63	10.62	35404853	210.75	0.03	95.53	90.01	69953008	132.74	69799465	0.997805
64	11.01	36692587	218.49	0.03	96.1	91.02	72429836	136.69	72312549	0.998381
65	12.8	42715394	257.96	0.04	96.76	92.08	82182910	150.12	82100728	0.999
66	11.15	37162738	221.27	0.03	95.51	89.91	73036768	134.97	72848131	0.997417
67	10.94	36470931	217.1	0.03	95.51	89.95	71937212	136.9	71762049	0.997565
68	12.87	42902116	255.4	0.04	95.19	89.28	82656860	151.46	82493035	0.998018
69	11.41	38022444	226.43	0.06	92.62	84.41	74770570	140.78	74459902	0.995845
70	12.38	41275428	245.68	0.06	93.66	84.97	80230712	149.46	80070796	0.998007
71	10.56	35185850	209.56	0.03	96.16	91.11	69545226	128.96	69461119	0.998791
72	11.11	37045722	220.48	0.06	91.93	86.85	72302970	129.45	72037241	0.996325
73	10.42	34727703	206.78	0.07	92.56	82.67	67707988	125.82	67705375	0.999961
74	10.64	35478826	211.15	0.07	92.46	82.26	69846204	132.68	69844055	0.999969
75	11.49	38292723	228.02	0.04	94.66	94.66	74910464	135.91	74721736	0.997481
76	12.97	43218856	257.39	0.08	90.53	80.52	84564794	146.63	84103924	0.99455
77	10.95	36512555	217.3	0.04	93.63	85.41	72105154	137.49	72066677	0.999466
78	15.91	53018630	315.73	0.03	95.58	90.09	104909050	198.74	104666587	0.997689
79	15.92	53079511	315.93	0.07	92.83	83.3	103766284	181.58	103521317	0.997639
80	15.16	50536803	300.85	0.07	92.45	83.06	98888976	181.92	98538391	0.996455
81	11.6	38659356	230.2	0.03	96.19	90.99	75604946	137.64	75529674	0.999004
82	12.54	41792852	248.86	0.03	96.02	90.69	81062846	151.35	80963943	0.99878
83	15.19	50645183	301.45	0.07	92.84	83.48	98807856	182.75	98581495	0.997709
84	14.77	49237822	293.11	0.03	96.2	91.09	95524168	178.58	95403987	0.998742
85	10.81	36018954	214.52	0.07	92.97	83.27	70248756	130.42	70245576	0.999955
86	10.87	36225612	215.71	0.04	93.17	84.06	70207342	128.15	70184715	0.999678
87	13.2	43992651	261.95	0.03	95.19	89.64	87074580	159.91	86734337	0.996093
88	11.96	39864117	237.35	0.07	92.31	82.78	76819254	144.27	76538221	0.996342
89	13.58	45266820	269.49	0.07	91.17	81.65	88114452	160.18	87725114	0.995581
90	11.96	39881503	237.35	0.08	90.78	81.07	77995326	139.11	77533842	0.994083
91	11.53	38446755	228.81	0.03	95.91	90.74	76153872	143.13	76023412	0.998287
92	15.08	50278136	299.26	0.03	95.23	89.66	98306536	183.33	97934107	0.996212
93	10.88	36272998	215.91	0.03	93.72	85.42	70308202	130.68	70267636	0.999423
94	11.92	39726175	254.05	0.03	97.48	93.58	76929744	144.89	76860508	0.9991
95	11.96	39875866	237.35	0.07	92.49	82.86	77295736	141.03	77044213	0.996746
96	13.13	43778375	260.56	0.06	93.31	93.31	85086058	158.98	84877933	0.997554
97	10.95	36486495	217.3	0.03	96	90.67	71285200	133.01	71209297	0.998935
98	12.7	42333288	252.03	0.06	93.77	84.77	82566264	153.98	82422569	0.99826
99	10.68	35613238	211.94	0.04	95.29	89.59	70412806	130.26	70224442	0.997325
100	12.69	42315854	251.83	0.07	92.88	83.69	81798564	154.03	81558833	0.997069
101	11.09	36959070	220.08	0.07	90.94	81.07	72061826	128.43	71723452	0.995304
102	11.04	36783408	219.09	0.04	93.09	83.83	72636622	139.06	72597497	0.999461
103	10.14	33802594	201.23	0.04	94.69	88.5	65075582	119.87	64902327	0.997338
104	12.99	43291574	257.79	0.06	93.49	84.86	84233392	157.28	84000768	0.997238
105	11.71	39028172	232.38	0.04	95.28	89.44	75545400	141.82	75413567	0.998255
106	10.69	35643598	212.14	0.05	93.52	84.47	69072140	127.63	69043337	0.999583
107	11.49	38290154	228.02	0.03	95.95	90.73	75872280	139.76	75750208	0.998391
108	12.86	42877681	255.21	0.03	96.19	91.25	84523658	161.54	84393256	0.998457
109	11.76	39207566	233.38	0.07	92.75	82.98	76251886	144.4	76249625	0.99997
110	10.61	35373941	210.56	0.04	93.03	83.98	68419956	127.99	68377893	0.999385
111	12.27	40911938	243.5	0.07	91.88	82.73	79540632	144.7	79210651	0.995851
112	13.83	46085067	274.46	0.07	92.67	84.76	90732868	171.84	90325109	0.995506
113	10.66	35541208	211.55	0.05	94.22	86.96	69805738	133.21	69654557	0.997834
114	13.56	45205709	269.1	0.03	96.05	90.99	89428334	166.68	89278219	0.998321
115	11.18	37254538	221.87	0.03	95.77	90.3	73377932	138.56	73255122	0.998326
116	13.38	44583873	265.53	0.06	93.07	84.98	87820936	162.74	87536989	0.996767
117	15.54	51785661	308.39	0.03	95.83	90.58	102130666	192.57	101942651	0.998159
118	10.44	34792252	207.18	0.03	95.44	89.75	68792290	127.68	68652782	0.997972
119	16.03	53445303	318.11	0.03	95.77	90.45	105317446	197.85	105091706	0.997857
120	10.69	35646571	212.14	0.04	93.01	83.97	69372000	129.14	69332136	0.999425
121	10.62	35391670	210.75	0.03	95.26	90.03	69861774	132.25	69725782	0.998053
122	11.14	37149637	221.07	0.04	95.28	89.46	73606112	136.79	73442713	0.99778
123	10.77	35907682	213.73	0.03	95.59	90.34	70944516	134.65	70706022	0.996638
124	11.63	38754337	230.8	0.03	95.52	90.03	76587166	142.09	76394306	0.997482
125	13.79	45953244	273.66	0.03	95.73	90.36	90489826	169.73	90295499	0.997852
126	11.36	37854050	225.44	0.08	92.21	81.97	74486218	141.2	74483469	0.999963
127	14.76	49204167	292.91	0.07	92.31	83.91	97108174	181.29	96695631	0.995752
128	11.29	37629009	224.05	0.07	92.94	83.73	72438732	135.83	72404337	0.999525
129	16.82	56074433	333.79	0.06	93.26	84.4	109513830	206.65	109214009	0.997262
130	20.96	69874664	415.95	0.05	93.7	86.42	138292624	256.68	137910891	0.99724
131	15.12	50413760	300.06	0.04	95.03	88.25	99024992	187.6	98884490	0.998581
132	11.43	38096297	226.83	0.04	95.28	89.44	74614998	143.01	74446528	0.997742
133	15.19	50647449	301.45	0.03	95.99	90.9	100128776	190.54	99959563	0.99831
134	12.76	42548335	253.22	0.03	95.6	90.06	84271054	156.16	84105607	0.998037
135	13.74	45808616	272.67	0.03	96.19	91.27	90653672	169.11	90516155	0.998483
136	13.24	44147895	262.75	0.03	96.11	91.06	87015570	164.33	86886380	0.998515
137	11.63	38753086	230.8	0.05	93.79	86.68	76581420	142.78	76360444	0.997114
138	11.79	39309435	233.97	0.03	96.2	91.22	76933642	149.27	76812573	0.998426
139	13.2	43992024	261.95	0.01	97.27	93.77	85130178	155.41	85033032	0.998859
140	10.5	35007415	208.37	0.03	95.75	90.41	69280756	131.19	69146010	0.998055
141	10.73	35774424	212.94	0.06	93.31	85.49	70638334	130.41	70427267	0.997012
142	11.42	38053430	226.63	0.03	96.27	91.38	74883840	144.24	74789554	0.998741
143	12.65	42178038	251.04	0.03	96.25	91.28	82688694	160.6	82557067	0.998408
144	10.65	35505343	211.35	0.03	95.53	89.85	70374014	130.22	70246246	0.998184
145	12.35	41155770	245.09	0.04	94.86	89.07	81235320	153.44	80867514	0.995472
146	13.53	45106093	268.5	0.03	95.92	90.72	89235324	168.36	89080806	0.998268
147	12.8	42670564	254.02	0.02	97.43	93.06	84387608	133.33	84235792	0.998201
148	11	36668426	218.29	0.02	97.43	93.06	72677906	110.1	72584955	0.998721
149	11.87	39560504	235.56	0.02	96.78	91.68	78076042	126.32	77929917	0.998128
150	11.89	39635047	235.96	0.02	97.27	92.66	78863498	118.39	78745354	0.998502
151	11.29	37621634	224.05	0.02	97.55	93.28	74764800	113.76	74682046	0.998893
152	12.93	43102347	256.6	0.02	97.48	93.17	85020404	137.14	84880803	0.998358
153	11.72	39075301	232.58	0.02	96.51	91.1	77455904	123.55	77298674	0.99797
154	10.32	34413457	204.8	0.02	97.22	92.54	68192838	104.91	68095861	0.998578
155	16.96	56517104	336.57	0.02	97.31	92.83	111562568	172.15	111446149	0.998956
156	11.67	38906285	231.59	0.02	96.87	91.87	76896288	118.32	76783435	0.998532
157	17.85	59509955	354.23	0.02	97.22	92.52	117938702	140.86	117789209	0.998732
158	12.49	41649796	247.86	0.02	97.21	92.59	82131014	123.23	81928420	0.997533
159	12.18	40585753	241.71	0.02	97.39	92.94	80590550	122.23	80472420	0.998534
160	12.36	41191873	245.28	0.02	97.59	93.38	81524288	126.78	81419849	0.998719
161	14.38	47925981	285.37	0.02	97.09	92.32	94900884	142.81	94783748	0.998766
162	15.42	51394866	306.01	0.02	97.23	92.6	101950686	158.72	101806084	0.998582
163	12.59	41959269	249.85	0.02	97.33	92.83	82814216	121.61	82710338	0.998746
164	11.71	39033062	232.38	0.02	97.49	93.14	77386268	116.46	77306426	0.998968
165	12.63	42101199	250.64	0.02	97.49	93.19	83231220	130	83121320	0.99868
166	12.21	40696904	242.31	0.02	97.46	93.11	80857152	119.37	80740655	0.998559
167	10.01	33355834	198.65	0.02	96.69	91.41	65473232	106.92	65377772	0.998542
168	12.85	42844699	255.01	0.02	97.14	92.42	85228802	126.62	85131286	0.998856
169	12.15	40512987	241.12	0.02	97.56	93.35	80448472	125.78	80342989	0.998689
170	12.42	41387573	246.47	0.02	97.26	92.71	81192926	137.22	81090402	0.998737
171	12.48	41603319	247.67	0.02	97.57	93.31	81926910	104.96	81833212	0.998856
172	11.87	39551634	235.56	0.02	97.46	93.11	78154174	122.48	78058038	0.99877
173	10.86	36194890	215.52	0.02	97.16	92.46	71376766	115.69	71295245	0.998858
174	11.15	37174396	221.27	0.02	97.52	93.25	73507178	112.63	73403810	0.998594
175	12.7	42334376	252.03	0.02	97.48	93.19	83738806	128.58	83616812	0.998543
176	17.44	58125491	346.1	0.02	97.09	92.37	114803012	191.68	114653626	0.998699
177	11.6	38658129	230.2	0.02	97.05	92.27	76237674	126.89	76132536	0.998621
178	11.65	38818148	231.19	0.02	97.47	93.11	76799618	109.52	76684640	0.998503
179	14.3	47669174	283.78	0.02	97.46	93.1	94703416	139.93	94564187	0.99853
180	13.53	45087622	268.5	0.02	97.48	93.14	89132604	131.55	89024064	0.998782
181	11.06	36868895	219.49	0.02	97.57	93.34	72989180	114.48	72908316	0.998892
182	11.48	38268086	227.82	0.02	97.05	92.26	76121612	117.41	76021631	0.998687
183	11.64	38808459	231	0.02	97.5	93.19	76508174	113.59	76416192	0.998798
184	12.99	43295098	257.79	0.02	97.56	93.31	85803548	131.58	85706539	0.998869
185	13.1	43670074	259.97	0.02	97.04	92.26	86195016	140.92	86079520	0.99866
186	13.59	45312918	269.69	0.02	97.19	92.53	88782764	134.49	88680107	0.998844
187	13.05	43502283	258.98	0.02	97.41	92.99	86443940	131.69	86327340	0.998651
188	11.63	38763702	230.8	0.02	97.38	92.93	76670106	122.11	76571868	0.998719
189	15	50006468	297.67	0.02	97.08	92.26	98942654	147.06	98806576	0.998625
190	11.92	39743163	236.55	0.02	97.41	93.02	78700088	125.81	78548359	0.998072
191	13	43330639	257.98	0.02	97.04	92.2	86047772	136.55	85940371	0.998752
192	10.69	35625076	212.14	0.02	96.82	91.76	70513444	114.74	70384742	0.998175
193	10.88	36269078	215.91	0.02	96.78	91.7	71432052	120.22	71291516	0.998033
194	11.35	37848900	225.24	0.02	97.22	92.59	74948288	115.01	74843191	0.998598
195	13.28	44278291	263.54	0.02	97.53	93.29	87500218	135.32	87386112	0.998696
196	14.71	49031002	291.92	0.02	97.07	92.29	96165312	156.91	96050160	0.998803
197	11.23	37449981	222.86	0.02	97.63	93.48	74023166	112.09	73942302	0.998908
198	11.92	39735424	236.55	0.02	97.59	93.38	78551420	122.41	78467599	0.998933
199	10.78	35938469	213.93	0.02	97.08	92.32	70952052	117.19	70848963	0.998547
200	13.38	44587573	265.53	0.02	97.06	92.27	88234428	143.98	88123404	0.998742
201	17.09	56963525	339.15	0.02	97.39	92.97	111774456	172.15	111664359	0.999015
202	12.27	40910045	243.5	0.02	97.43	93.02	80711298	106.85	80604046	0.998671
203	14.55	48498464	288.74	0.02	97.43	93.01	95960758	126.11	95856269	0.998911
204	12.87	42884637	255.4	0.02	97.12	92.38	85092122	133.81	84994753	0.998856
205	12.87	42906357	255.4	0.02	97.27	92.65	85181232	124.19	85063569	0.998619
206	13.14	43805902	260.76	0.02	97.43	93.06	86583708	126.7	86464757	0.998626
207	11.47	38248864	227.62	0.02	97.53	93.24	75622428	116.81	75541987	0.998936
208	15.04	50136275	298.47	0.02	97.26	92.69	98974622	149.1	98815319	0.99839
DCM, dilated cardiomyopathy; Q20, percentage of bases with a Phred score greater than 20 to the total base; Q30, percentage of bases with a Phred score greater than 30 to the total base.

## Sheet: Table S2
Table S2 The number of variants carried by each DCM patient before and after filtering
DCM patient ID	Before filtering				After filtering
	Number of SNPs	Number of transitions	Number of transversions	Number of indels	Number of SNPs	Number of transitions	Number of Transversions	Number of indels
1	110162	76695	33467	17847	40	31	9	11
2	112110	78105	34005	17935	50	37	13	15
3	111613	77736	33877	17897	33	21	12	15
4	109701	76400	33301	17346	51	36	15	18
5	112979	78660	34319	18323	47	38	9	10
6	110546	77080	33466	17570	50	34	16	9
7	109128	76089	33039	16824	40	28	12	10
8	111661	77769	33892	17926	34	25	9	11
9	110310	76976	33334	17473	50	33	17	19
10	113478	79033	34445	18434	38	28	10	11
11	111097	77142	33955	17848	56	43	13	17
12	114817	79768	35049	18707	40	27	13	12
13	113110	78686	34424	18497	44	22	22	15
14	113843	79344	34499	18728	28	20	8	12
15	112070	77946	34124	18438	33	17	16	12
16	114221	79432	34789	18372	39	27	12	17
17	114465	79514	34951	18568	46	31	15	10
18	112411	78230	34181	18282	59	19	40	13
19	111697	77742	33955	17824	44	29	15	18
20	110410	76851	33559	17765	50	31	19	13
21	113163	78568	34595	18731	27	21	6	15
22	112317	78104	34213	17768	40	27	13	19
23	112270	77998	34272	18042	35	27	8	17
24	114008	79293	34715	18559	37	24	13	11
25	112891	78577	34314	17974	41	25	16	13
26	113669	79114	34555	18631	51	33	18	15
27	111334	77510	33824	17601	35	25	10	12
28	112842	78539	34303	18052	44	35	9	14
29	112151	78087	34064	17414	29	19	10	9
30	113175	78749	34426	18426	38	28	10	10
31	112761	78669	34092	18334	31	24	7	16
32	107953	75056	32897	17039	33	23	10	10
33	112159	77965	34194	17966	44	28	16	8
34	113759	79268	34491	18356	32	23	9	13
35	111296	77508	33788	17943	47	34	13	12
36	110643	77159	33484	17750	33	24	9	15
37	114147	79492	34655	17715	39	27	12	12
38	110966	77258	33708	17918	39	31	8	13
39	112432	78261	34171	17980	35	21	14	14
40	113268	78862	34406	18169	34	19	15	9
41	114027	79326	34701	18536	34	26	8	15
42	112573	78149	34424	18234	36	27	9	16
43	110075	76561	33514	17791	41	24	17	18
44	114338	79748	34590	18852	56	39	17	11
45	111679	77513	34166	18137	41	28	13	10
46	111236	77339	33897	18122	38	19	19	9
47	111846	77933	33913	18255	38	25	13	9
48	112574	78270	34304	18059	38	26	12	14
49	111242	77374	33868	18056	35	20	15	13
50	110940	77358	33582	17513	46	36	10	13
51	112269	78029	34240	18131	33	24	9	17
52	111989	77983	34006	17971	45	35	10	13
53	113434	78959	34475	18641	36	20	16	8
54	109545	76379	33166	17378	39	22	17	15
55	115100	80091	35009	18766	43	31	12	11
56	113222	78810	34412	18321	34	22	12	14
57	112021	77960	34061	18028	39	27	12	18
58	114312	79454	34858	18592	38	26	12	10
59	110577	76896	33681	17857	50	34	16	8
60	111698	77841	33857	17854	44	28	16	13
61	112896	78460	34436	17701	37	25	12	15
62	113739	79028	34711	18218	51	32	19	18
63	111537	77542	33995	17942	32	22	10	7
64	111437	77695	33742	18050	48	33	15	10
65	115855	80432	35423	20497	47	38	9	15
66	111551	77393	34158	18083	34	24	10	20
67	111934	77855	34079	17913	37	26	11	20
68	111656	77556	34100	17979	35	26	9	6
69	111321	77475	33846	17993	40	27	13	11
70	111373	77717	33656	17934	38	22	16	15
71	112057	77923	34134	18143	36	26	10	15
72	112336	78242	34094	17518	45	36	9	16
73	110468	76854	33614	17282	65	51	14	14
74	110089	76617	33472	17300	39	26	13	12
75	112509	78259	34250	18151	38	28	10	9
76	112649	78411	34238	18009	39	27	12	16
77	110873	77259	33614	16880	32	20	12	9
78	131600	91763	39837	20586	48	35	13	16
79	113758	78978	34780	18773	49	28	21	17
80	113396	78960	34436	18462	42	34	8	14
81	112229	78110	34119	18300	29	20	9	17
82	111133	77441	33692	18112	40	29	11	6
83	114517	79581	34936	18732	37	26	11	14
84	113118	78554	34564	18383	42	30	12	11
85	110370	76798	33572	17196	38	26	12	8
86	107671	75053	32618	16996	37	23	14	11
87	114032	79274	34758	18571	35	22	13	19
88	110184	76775	33409	17386	24	17	7	12
89	110309	76672	33637	17666	47	36	11	7
90	112612	78504	34108	17695	40	30	10	11
91	112813	78452	34361	18224	31	23	8	11
92	113114	78731	34383	18524	40	26	14	14
93	108520	75590	32930	16926	38	23	15	12
94	113661	78832	34829	20563	34	24	10	11
95	111101	77336	33765	17560	35	27	8	9
96	111705	77728	33977	17553	46	33	13	15
97	111662	77733	33929	17928	38	23	15	15
98	113494	79059	34435	17935	32	26	6	13
99	111945	77965	33980	18051	38	28	10	14
100	111691	77810	33881	17996	42	29	13	12
101	110131	76626	33505	17402	28	22	6	12
102	111010	77240	33770	17556	38	28	10	8
103	108878	75591	33287	17249	36	25	11	14
104	113042	78725	34317	18137	42	26	16	14
105	110604	76785	33819	17744	40	31	9	18
106	110153	76691	33462	17146	56	35	21	15
107	113777	79053	34724	18493	40	28	12	14
108	112371	78136	34235	18183	36	28	8	11
109	110492	76954	33538	17557	54	38	16	11
110	109375	76167	33208	17195	39	23	16	14
111	110726	77040	33686	17518	37	24	13	18
112	110708	76961	33747	17643	49	36	13	8
113	110723	77042	33681	17767	34	24	10	14
114	114417	79404	35013	18690	40	23	17	13
115	112169	78107	34062	18123	35	28	7	10
116	112635	78470	34165	18350	41	30	11	13
117	114088	79297	34791	18863	26	19	7	11
118	111763	77706	34057	17945	40	30	10	16
119	115134	79938	35196	18863	46	30	16	13
120	110967	77105	33862	17599	38	23	15	11
121	112055	77963	34092	17830	47	34	13	15
122	113554	79090	34464	18302	35	20	15	6
123	111284	77554	33730	17952	41	27	14	15
124	113410	78892	34518	18240	41	28	13	16
125	114090	79301	34789	18705	38	29	9	9
126	111274	77648	33626	17423	32	24	8	10
127	113619	78826	34793	18619	48	33	15	11
128	110390	76840	33550	17046	40	30	10	13
129	114060	79398	34662	18643	35	22	13	8
130	115327	80230	35097	19268	38	25	13	7
131	114281	79488	34793	18801	33	20	13	14
132	112809	78499	34310	18155	32	21	11	11
133	113621	78949	34672	18479	45	33	12	15
134	113451	78751	34700	18475	43	33	10	12
135	114766	79836	34930	18665	32	20	12	9
136	112680	78314	34366	17999	39	27	12	13
137	113538	78975	34563	18274	41	27	14	9
138	146386	101944	44442	22440	70	50	20	28
139	113510	78944	34566	18308	39	27	12	22
140	112133	78156	33977	17919	44	29	15	12
141	111327	77641	33686	17938	46	33	13	11
142	113004	78748	34256	17752	35	24	11	11
143	112166	78140	34026	18100	33	20	13	14
144	112609	78520	34089	18221	34	24	10	7
145	113719	79226	34493	18260	41	31	10	20
146	113462	78969	34493	18706	39	29	10	8
147	116678	80888	35790	20447	45	26	19	11
148	115407	80202	35205	20387	39	29	10	13
149	113864	79264	34600	19748	40	24	16	11
150	116466	80918	35548	20741	37	28	9	17
151	115876	80505	35371	20560	36	28	8	10
152	114689	79710	34979	20315	47	37	10	15
153	114268	79320	34948	19747	43	29	14	11
154	114689	79682	35007	20105	37	29	8	9
155	114478	79368	35110	19993	42	28	14	12
156	112509	78136	34373	19579	39	22	17	12
157	115902	80332	35570	20802	26	16	10	11
158	115762	80152	35610	20369	43	31	12	14
159	116566	80849	35717	20684	35	26	9	10
160	114931	79795	35136	20579	44	29	15	9
161	115139	79864	35275	20299	43	30	13	16
162	116717	81072	35645	20996	34	25	9	8
163	114782	79687	35095	20179	30	23	7	12
164	115263	80107	35156	20414	45	32	13	9
165	116215	80639	35576	20537	36	24	12	9
166	116754	81030	35724	20440	32	18	14	17
167	111256	77103	34153	19013	48	37	11	15
168	114958	79623	35335	20532	50	31	19	17
169	115843	80400	35443	20339	46	27	19	14
170	112415	78218	34197	19544	34	23	11	17
171	113239	78572	34667	19817	30	19	11	18
172	115882	80384	35498	20392	34	25	9	16
173	113236	78872	34364	19653	35	27	8	13
174	113887	79038	34849	19974	39	28	11	13
175	116267	80662	35605	20429	32	23	9	11
176	115162	79872	35290	20427	44	28	16	11
177	113681	79029	34652	19371	37	26	11	13
178	115745	80379	35366	20503	47	31	16	10
179	118293	81897	36396	20859	42	30	12	10
180	116135	80359	35776	20757	38	26	12	12
181	114928	79653	35275	20233	36	25	11	10
182	114549	79429	35120	20111	41	26	15	7
183	114400	79304	35096	20269	36	20	16	7
184	115317	80005	35312	20496	39	26	13	13
185	113143	78655	34488	19770	38	29	9	15
186	115160	79924	35236	19977	38	29	9	12
187	115694	80307	35387	20694	44	32	12	12
188	115668	80468	35200	20215	34	20	14	15
189	114966	79754	35212	20529	37	20	17	13
190	114995	79815	35180	20108	48	37	11	8
191	115481	80119	35362	20382	35	19	16	8
192	114536	79648	34888	19669	35	24	11	16
193	111643	77714	33929	18855	43	32	11	17
194	115236	79898	35338	20266	40	24	16	10
195	116055	80618	35437	20548	32	24	8	13
196	114564	79535	35029	20114	31	21	10	12
197	115639	80220	35419	20226	27	22	5	18
198	114784	79699	35085	20172	42	28	14	14
199	112572	78188	34384	19375	44	35	9	11
200	114501	79465	35036	20083	41	25	16	21
201	114184	79165	35019	20362	47	37	10	12
202	114882	79743	35139	20105	44	32	12	8
203	116146	80651	35495	20642	39	25	14	17
204	116108	80539	35569	20385	38	24	14	13
205	116579	80785	35794	20561	45	30	15	12
206	115451	80137	35314	20457	40	27	13	14
207	115454	80348	35106	20377	42	28	14	15
208	116048	80523	35525	20082	40	25	15	12
DCM, dilated cardiomyopathy.

## Sheet: Table S3
Table S3 Rare variants in high evidence genes identified in the Fuwai DCM HTx cohort.
Gene	Transcript	Exon	Coding change	Protein change	Variant type	Allele frequency in gnomAD_exome	Pathogenicity assessment according to ACMG/AMP 2015 guidelines	ACMG/AMP criteria	Variation ID reported in Clinvar	Interpretation in Clinvar	PMID
ACTC1	NM_005159	exon3	c.A254C	p.E85A	missense	.	VUS	PM2,PP2,PP3	.	.
ACTN2	NM_001103	exon10	c.C1040T	p.T347M	missense	0.0001	VUS	PM1	178985	Conflicting interpretations of pathogenicity	26899768
ACTN2	NM_001103	exon17	c.A2108T	p.Q703L	missense	4.376e-05	VUS	PM1	463200	Conflicting interpretations of pathogenicity
BAG3	NM_004281	exon2	c.422dupT	p.M141fs	frameshift insertion	.	LP	PVS1,PM2	.	.	30681346
BAG3	NM_004281	exon2	c.C268T	p.R90X	stop-gain	.	P	PVS1,PM2,PP3,PP5	372723	P	21353195
BAG3	NM_004281	exon2	c.C448T	p.Q150X	stop-gain	.	P	PVS1,PM2,PP3	.	.
BAG3	NM_004281	exon3	c.839_848del	p.P280fs	frameshift deletion	.	LP	PVS1,PM2	.	.
BAG3	NM_004281	exon4	c.1355_1357del	p.452_453del	nonframeshift deletion	.	VUS	PM2,PM4	.	.
BAG3	NM_004281	exon4	c.C1309T	p.Q437X	stop-gain	.	VUS	PM2,PP3	.	.
DES	NM_001927	exon1	c.G155C	p.R52P	missense	.	VUS	PM1,PM2,PP3	1490582	VUS
DES	NM_001927	exon6	c.A1099C	p.I367L	missense	1.989e-05	VUS	PM1,PM2,PP3	1006716	VUS	1741857
DES	NM_001927	exon6	c.A1141G	p.M381V	missense	.	VUS	PM1,PM2,PP3	.	.
DSP	NM_004415	exon14	c.G1765T	p.E589X	stop-gain	.	P	PVS1,PM2,PP3	.	.
DSP	NM_004415	exon18	c.2452_2453del	p.L818fs	frameshift deletion	.	LP	PVS1,PM2	.	.
DSP	NM_004415	exon24	c.C6496T	p.R2166X	stop-gain	7.954e-06	P	PVS1,PM2,PP3,PP5	199903	P/LP	32969603, 28471438
DSP	NM_004415	exon6	c.C747G	p.Y249X	stop-gain	.	P	PVS1,PM2,PP3	.	.
DSP	NM_004415	exon8	c.C943T	p.R315C	missense	0.0001	VUS	PM1,PM2,BS2	44982	Conflicting interpretations of pathogenicity	24503780
FLNC	NM_001458	exon11	c.G1730A	p.W577X	stop-gain	.	P	PVS1,PM2,PP3,PP5	1451045	P
FLNC	NM_001458	exon12	c.A1910G	p.E637G	missense	3.205e-05	VUS	PM1,PP3	1513083	LB
FLNC	NM_001458	exon12	c.C1948T	p.R650X	stop-gain	0	P	PVS1,PM2,PP3,PP5	421215	Conflicting interpretations of pathogenicity	32160020
FLNC	NM_001458	exon13	c.G2084A	p.R695H	missense	1.603e-05	VUS	PM1,PM2,PP3	951366	LB	32112656
FLNC	NM_001458	exon14	c.2262delC	p.F754fs	frameshift deletion	.	LP	PVS1,PM2	.	.
FLNC	NM_001458	exon14	c.C2263T	p.R755W	missense	.	VUS	PM1,PM2,PP3	1063882	VUS
FLNC	NM_001458	exon16	c.2446dupG	p.A815fs	frameshift insertion	.	LP	PVS1,PM2	.	.
FLNC	NM_001458	exon19	c.G2845A	p.D949N	missense	4.008e-06	VUS	PM1,PM2,PP3	1486487	LB
FLNC	NM_001458	exon2	c.G601A	p.G201S	missense	.	VUS	PM1,PM2,PP3	943338	VUS
FLNC	NM_001458	exon20	c.3062_3063insGGAA	p.A1021fs	frameshift insertion	.	LP	PVS1,PM2	.	.
FLNC	NM_001458	exon21	c.3611_3612del	p.I1204fs	frameshift deletion	.	LP	PVS1,PM2	.	.
FLNC	NM_001458	exon21	c.C3706T	p.P1236S	missense	3.228e-05	VUS	PM1,PM2,PP3	952154	VUS	30411535
FLNC	NM_001458	exon33	c.C5417T	p.S1806L	missense	.	VUS	PM1,PP3	1358749	VUS
FLNC	NM_001458	exon35	c.5842+1G>A	.	splicing	.	P	PVS1,PM2,PP5	1487519	LP
FLNC	NM_001458	exon35	c.C5791T	p.R1931C	missense	4.776e-05	VUS	PM1,PP3	452971	Conflicting interpretations of pathogenicity	30411535
FLNC	NM_001458	exon37	c.6049_6050insTGCGCAAGAGTGGCAAGCA	p.V2017fs	frameshift insertion	.	LP	PVS1,PM2	.	.
FLNC	NM_001458	exon37	c.6115delG	p.G2039fs	frameshift deletion	.	LP	PVS1,PM2	.	.
FLNC	NM_001458	exon37	c.6147delG	p.K2049fs	frameshift deletion	.	LP	PVS1,PM2	.	.
FLNC	NM_001458	exon37	c.G6141A	p.W2047X	stop-gain	.	P	PVS1,PM2,PP3	.	.
FLNC	NM_001458	exon38	c.6280delG	p.G2094fs	frameshift deletion	.	LP	PVS1,PM2	.	.
FLNC	NM_001458	exon39	c.C6427T	p.Q2143X	stop-gain	.	P	PVS1,PM2,PP3	.	.
FLNC	NM_001458	exon4	c.C805T	p.R269X	stop-gain	4.005e-06	P	PVS1,PM2,PP3,PP5	539411	P	30067491
FLNC	NM_001458	exon40	c.T6665G	p.F2222C	missense	.	VUS	PM1,PM2,PP3	.	.
FLNC	NM_001458	exon6	c.T977C	p.V326A	missense	5.615e-05	VUS	PM1,PP3	1044831	Conflicting interpretations of pathogenicity	30411535
FLNC	NM_001458	exon7	c.C1141T	p.R381C	missense	4.008e-06	VUS	PM1,PP3	1009919	Conflicting interpretations of pathogenicity
FLNC	NM_001458	exon8	c.1351delC	p.H451fs	frameshift deletion	.	LP	PVS1,PM2	.	.
FLNC	NM_001458	exon8	c.1365delG	p.A455fs	frameshift deletion	.	LP	PVS1,PM2	.	.
FLNC	NM_001458	exon8	c.1370_1381del	p.457_461del	nonframeshift deletion	.	VUS	PM2,PM4	.	.
FLNC	NM_001458	exon8	c.G1294A	p.G432S	missense	.	VUS	PM1,PM2	.	.
FLNC	NM_001458	exon8	c.G1354A	p.V452M	missense	0.0001	VUS	PM1,PP3,BP6	471970	B/LB
FLNC	NM_001458	exon9	c.G1435A	p.A479T	missense	3.611e-05	VUS	PM1,PM2,PP3	539393	LB
JPH2	NM_020433	exon3	c.G1247A	p.R416H	missense	7.977e-06	VUS	PP3	1284379	VUS
LMNA	NM_005572	exon1	c.C253G	p.L85V	missense	.	VUS	PM1,PM2,PP3	.	.
LMNA	NM_005572	exon1	c.G252T	p.E84D	missense	.	LP	PS1,PM1,PM2,PP3	200929	Conflicting interpretations of pathogenicity
LMNA	NM_005572	exon1	c.G266A	p.R89H	missense	.	LP	PM1,PM2,PM5,PP3	48059	VUS	23702046, 20160190, 12628721
LMNA	NM_005572	exon1	c.G4T	p.E2X	stop-gain	.	P	PVS1,PM2,PP3,PP5	568051	P	18585512
LMNA	NM_005572	exon3	c.514-2A>G	.	splicing	.	LP	PVS1,PM2	.	.
LMNA	NM_005572	exon3	c.C568T	p.R190W	missense	.	LP	PM1,PM2,PP3,PP5	66908	P	26199943, 37125290, 17334235, 16537768, 15539782
LMNA	NM_005572	exon4	c.681_683del	p.227_228del	nonframeshift deletion	.	VUS	PM2,PM4	.	.
LMNA	NM_005572	exon4	c.C673T	p.R225X	stop-gain	.	P	PVS1,PM2,PP3,PP5	48074	P	31668660
LMNA	NM_005572	exon4	c.C725T	p.A242V	missense	7.954e-06	LP	PS3,PM1,PM2,PP3	48076	Conflicting interpretations of pathogenicity	35526016
LMNA	NM_005572	exon7	c.1169dupC	p.S390fs	frameshift insertion	.	LP	PVS1,PM2	.	.
MYH7	NM_000257	exon12	c.G1106A	p.R369Q	missense	.	LP	PM1,PM2,PP2,PP3,PP5,BP1	42822	LP	32458740, 35007503
MYH7	NM_000257	exon21	c.G2335A	p.E779K	missense	.	LP	PM1,PM2,PM5,PP2,PP3,BP1	1339203	Conflicting interpretations of pathogenicity
MYH7	NM_000257	exon25	c.C3133T	p.R1045C	missense	2.386e-05	LP	PM1,PM2,PP2,PP3,BP1	177753	VUS
MYH7	NM_000257	exon34	c.G4855A	p.E1619K	missense	.	LP	PM1,PM2,PP2,PP3,BP1	181268	Conflicting interpretations of pathogenicity
MYH7	NM_000257	exon38	c.C5561T	p.T1854M	missense	2.402e-05	LP	PM1,PM2,PP2,PP3,BP1	161320	Conflicting interpretations of pathogenicity	31638223
MYH7	NM_000257	exon39	c.G5704C	p.E1902Q	missense	0.0001	LP	PM1,PM2,PP2,PP3,BP1	43082	LB	22763267
MYH7	NM_000257	exon5	c.C427T	p.R143W	missense	2.784e-05	LP	PM1,PM2,PP2,PP3,PP5,BP1	164401	P/LP	34598319, 34598319
NEXN	NM_144573	exon7	c.T680C	p.L227S	missense	2.006e-05	VUS	PM1,PM2	431969	VUS
PLN	NM_002667	exon2	c.36_38del	p.12_13del	nonframeshift deletion	3.982e-06	LP	PM2,PM4,PP1,PP5	44580	Conflicting interpretations of pathogenicity	34924461, 30547415
RBM20	NM_001134363	exon11	c.2743delG	p.G915fs	frameshift deletion	.	LP	PVS1,PM2	.	.
RBM20	NM_001134363	exon9	c.G1901A	p.R634Q	missense	6.563e-06	VUS	PM2,PP3,PP5	269	P/LP	20590677, 19712804
RBM20	NM_001134363	exon9	c.G1910A	p.S637N	missense	.	VUS	PM2,PP3,PP5	202062	Conflicting interpretations of pathogenicity
RBM20	NM_001134363	exon9	c.G2304A	p.W768X	stop-gain	3.833e-05	VUS	PVS1	.	.
RBM20	NM_001134363	exon9	c.T1884A	p.Y628X	stop-gain	.	LP	PVS1,PM2	.	.
SCN5A	NM_198056	exon12	c.A1768C	p.K590Q	missense	4.031e-06	VUS	PM1,PM2,PP3,BP1	406436	VUS	28878402
SCN5A	NM_198056	exon14	c.G2066A	p.R689H	missense	9.245e-05	LB	PM1,PM2,PP3,BS2,BP1	67710	VUS	37122211, 22490985
SCN5A	NM_198056	exon17	c.A2873G	p.N958S	missense	.	VUS	PM2,PP3,BP1	920152	VUS
SCN5A	NM_198056	exon19	c.A3467G	p.D1156G	missense	2.937e-05	VUS	PM2,BP1	201495	VUS
SCN5A	NM_198056	exon20	c.G3556A	p.A1186T	missense	1.681e-05	LB	PM2,BP1,BP4	67802	VUS	31983221
SCN5A	NM_198056	exon27	c.G4795A	p.V1599I	missense	.	VUS	PM1,PM2,PP3,BP1	1411234	VUS
SCN5A	NM_198056	exon28	c.G5362A	p.E1788K	missense	.	VUS	PM1,PM2,PP3,BP1	.	.
SCN5A	NM_198056	exon3	c.A299G	p.K100R	missense	.	VUS	PM1,PM2,PP3,BP1	.	.
SCN5A	NM_198056	exon6	c.G674A	p.R225Q	missense	1.655e-05	LB	PM1,PM2,PP3,BS2,BP1	68033	Conflicting interpretations of pathogenicity	35701104, 33071830
SCN5A	NM_198056	exon7	c.G874A	p.G292S	missense	2.81e-05	LB	PM1,PM2,PP3,BS2,BP1	68053	VUS	36516610
TNNT2	NM_000364	exon11	c.C418T	p.R140C	missense	0	P	PM1,PM2,PP3,PP5,BP1	43636	P/LP
TNNT2	NM_000364	exon11	c.C451T	p.R151W	missense	.	P	PM1,PM2,PP3,PP5,BP1	12414	P	29367541, 32969603
TNNT2	NM_000364	exon11	c.C481T	p.R161C	missense	4.019e-06	VUS	PM1,PM2,PP3,BP1	537256	VUS	29719515, 20031601
TNNT2	NM_000364	exon11	c.G452A	p.R151Q	missense	7.997e-06	VUS	PM1,PM2,PP3,BP1	181617	Conflicting interpretations of pathogenicity	35284542, 34135346, 26899768
TNNT2	NM_000364	exon13	c.650_652del	p.217_218del	nonframeshift deletion	.	LP	PM2,PM4,PP1,PP5	43659	P/LP
TPM1	NM_001330346	exon8	c.C722T	p.A241V	missense	.	VUS	PM1,PM2,PP3	31896	VUS	35029218, 30240712, 29367539
TTN	NM_001256850	exon11	c.1800+1G>A	.	splicing	4.774e-05	P	PVS1,PM2,PP5	46689	Conflicting interpretations of pathogenicity
TTN	NM_001256850	exon177	c.36961+2T>C	.	splicing	.	LP	PVS1,PM2	.	.
TTN	NM_001256850	exon177	c.A36874T	p.K12292X	stop-gain	.	P	PVS1,PM2,PP3	.	.
TTN	NM_001256850	exon177	c.C36939A	p.Y12313X	stop-gain	.	LP	PVS1,PM2	.	.
TTN	NM_001256850	exon198	c.G41362T	p.E13788X	stop-gain	.	P	PVS1,PM2,PP3	655302	VUS
TTN	NM_001256850	exon199	c.C41483A	p.S13828Y	missense	.	LP	PM1,PM2,PP2,PP3,BP1	.	.
TTN	NM_001256850	exon204	c.C42834A	p.Y14278X	stop-gain	.	LP	PVS1,PM2	.	.
TTN	NM_001256850	exon213	c.T44533C	p.W14845R	missense	.	VUS	PM2,PP2,BP1	.	.
TTN	NM_001256850	exon214	c.44637dupA	p.Y14880fs	frameshift insertion	.	LP	PVS1,PM2	.	.
TTN	NM_001256850	exon228	c.C48635G	p.P16212R	missense	.	VUS	PM2,PP2,PP3,BP1	165987	VUS
TTN	NM_001256850	exon231	c.49455_49456insA	p.G16486fs	frameshift insertion	.	LP	PVS1,PM2	.	.
TTN	NM_001256850	exon232	c.G49850C	p.S16617T	missense	4.033e-06	LP	PM1,PM2,PP2,PP3,BP1	.	.
TTN	NM_001256850	exon238	c.51127+1G>A	.	splicing	.	LP	PVS1,PM2	.	.
TTN	NM_001256850	exon241	c.C51961T	p.R17321W	missense	8.058e-06	VUS	PM2,PP2,PP3,BP1	467293	Conflicting interpretations of pathogenicity
TTN	NM_001256850	exon242	c.T52144C	p.Y17382H	missense	.	VUS	PM2,PP2,PP3,BP1	.	.
TTN	NM_001256850	exon246	c.G53048A	p.R17683Q	missense	7.24e-05	VUS	PM2,PP2,BP1	165949	Conflicting interpretations of pathogenicity	31983221
TTN	NM_001256850	exon248	c.A53726C	p.Y17909S	missense	.	VUS	PM2,PP2,PP3,BP1	.	.
TTN	NM_001256850	exon249	c.C54007A	p.L18003I	missense	.	VUS	PM2,PP2,PP3,BP1	.	.
TTN	NM_001256850	exon252	c.54984dupC	p.K18329fs	frameshift insertion	.	LP	PVS1,PM2	.	.
TTN	NM_001256850	exon254	c.55817_55818insTTAG	p.R18606_A18607delinsSX	stop-gain	.	LP	PVS1,PM2	.	.
TTN	NM_001256850	exon258	c.59251_59252insT	p.R19751fs	frameshift insertion	.	LP	PVS1,PM2	.	.
TTN	NM_001256850	exon261	c.G60136A	p.G20046R	missense	.	VUS	PM2,PP2,BP1	.	.
TTN	NM_001256850	exon270	c.G63150A	p.W21050X	stop-gain	.	P	PVS1,PM2,PP3	.	.
TTN	NM_001256850	exon272	c.G63418A	p.E21140K	missense	1.621e-05	VUS	PM2,PP2,PP3,BP1	405112	VUS
TTN	NM_001256850	exon274	c.A64315T	p.R21439X	stop-gain	.	P	PVS1,PM2,PP3	.	.
TTN	NM_001256850	exon275	c.64561delA	p.R21521fs	frameshift deletion	.	LP	PVS1,PM2	.	.
TTN	NM_001256850	exon275	c.G64715A	p.R21572H	missense	7.247e-05	VUS	PM2,PP2,PP3,BP1	467422	VUS
TTN	NM_001256850	exon276	c.73429delA	p.S24477fs	frameshift deletion	.	LP	PVS1,PM2	.	.
TTN	NM_001256850	exon276	c.73594dupA	p.S24532fs	frameshift insertion	.	LP	PVS1,PM2	.	.
TTN	NM_001256850	exon276	c.79088_79091del	p.K26363fs	frameshift deletion	.	LP	PVS1,PM2	.	.
TTN	NM_001256850	exon276	c.79285delG	p.D26429fs	frameshift deletion	.	LP	PVS1,PM2	.	.
TTN	NM_001256850	exon276	c.C68419G	p.L22807V	missense	.	VUS	PM2,PP2,BP1	.	.
TTN	NM_001256850	exon276	c.C76313T	p.P25438L	missense	.	VUS	PM2,PP2,BP1	.	.
TTN	NM_001256850	exon276	c.C80344T	p.R26782X	stop-gain	8.05e-06	P	PVS1,PM2,PP3,PP5	853671	LP
TTN	NM_001256850	exon276	c.T66189A	p.Y22063X	stop-gain	.	LP	PVS1,PM2	.	.
TTN	NM_001256850	exon276	c.T79103A	p.V26368D	missense	4.055e-06	VUS	PM2,PP2,PP3,BP1	.	.
TTN	NM_001256850	exon277	c.C82117T	p.R27373X	stop-gain	8.053e-06	P	PVS1,PM2,PP3,PP5	420065	P	24558114, 26084686
TTN	NM_001256850	exon278	c.82510delG	p.V27504fs	frameshift deletion	.	LP	PVS1,PM2	.	.
TTN	NM_001256850	exon278	c.82741_82748del	p.D27581fs	frameshift deletion	.	P	PVS1,PM2,PP5	1520035	LP
TTN	NM_001256850	exon279	c.82849_82852del	p.W27617fs	frameshift deletion	.	LP	PVS1,PM2	.	.
TTN	NM_001256850	exon28	c.C4874G	p.S1625C	missense	4.002e-05	VUS	PM2,PP2,BP1	179059	VUS
TTN	NM_001256850	exon28	c.G5740A	p.A1914T	missense	0.0001	VUS	PM2,PP2,PP3,BP1	496991	Conflicting interpretations of pathogenicity	32344918
TTN	NM_001256850	exon28	c.G6490A	p.A2164T	missense	0.0001	LB	PM2,PP2,PP3,BP1,BP6	517038	LB	30335000
TTN	NM_001256850	exon285	c.G84959A	p.G28320E	missense	.	VUS	PM2,PP2,PP3,BP1	.	.
TTN	NM_001256850	exon286	c.86628_86629del	p.T28876fs	frameshift deletion	.	LP	PVS1,PM2	.	.
TTN	NM_001256850	exon287	c.G86779T	p.E28927X	stop-gain	.	P	PVS1,PM2,PP3	.	.
TTN	NM_001256850	exon289	c.T87337C	p.Y29113H	missense	4.023e-06	VUS	PM2,PP2,PP3,BP1	.	.
TTN	NM_001256850	exon290	c.89421_89424del	p.K29807fs	frameshift deletion	.	P	PVS1,PM2,PP5	165719	P/LP	31514951, 23418287
TTN	NM_001256850	exon291	c.89671dupT	p.Y29891fs	frameshift insertion	.	LP	PVS1,PM2	.	.
TTN	NM_001256850	exon294	c.90641dupC	p.T30214fs	frameshift insertion	.	LP	PVS1,PM2	.	.
TTN	NM_001256850	exon294	c.C90721T	p.R30241W	missense	4.03e-06	VUS	PM2,PP2,PP3,BP1	.	.
TTN	NM_001256850	exon296	c.G91312C	p.D30438H	missense	8.44e-05	VUS	PM2,PP2,PP3,BP1	404774	VUS
TTN	NM_001256850	exon298	c.C92053G	p.L30685V	missense	4.038e-06	VUS	PM2,PP2,PP3,BP1	.	.
TTN	NM_001256850	exon307	c.95428_95431del	p.V31810fs	frameshift deletion	.	LP	PVS1,PM2	.	.
TTN	NM_001256850	exon307	c.95726delG	p.G31909fs	frameshift deletion	.	LP	PVS1,PM2	.	.
TTN	NM_001256850	exon307	c.C95419T	p.R31807X	stop-gain	4.025e-06	P	PVS1,PM2,PP3,PP5	2099057	LP
TTN	NM_001256850	exon307	c.C95473T	p.R31825C	missense	0.0001	VUS	PM2,PP2,PP3,BP1	466681	VUS
TTN	NM_001256850	exon308	c.96555delG	p.G32185fs	frameshift deletion	.	LP	PVS1,PM2	.	.
TTN	NM_001256850	exon308	c.96661_96663del	p.32221_32221del	nonframeshift deletion	.	VUS	PM2,PM4	.	.
TTN	NM_001256850	exon308	c.A99967T	p.N33323Y	missense	1.204e-05	VUS	PM2,PP2,BP1	894000	Conflicting interpretations of pathogenicity
TTN	NM_001256850	exon308	c.C100483T	p.R33495W	missense	5.22e-05	VUS	PM2,PP2,PP3,BP1	332686	Conflicting interpretations of pathogenicity
TTN	NM_001256850	exon308	c.C100597T	p.R33533C	missense	4.816e-05	LP	PM1,PM2,PP2,PP3,BP1	894306	Conflicting interpretations of pathogenicity
TTN	NM_001256850	exon308	c.C96358T	p.R32120W	missense	8.034e-05	VUS	PM2,PP2,PP3,BP1	178159	VUS
TTN	NM_001256850	exon38	c.A9092G	p.H3031R	missense	.	VUS	PM2,PP2,BP1	.	.
TTN	NM_001256850	exon38	c.G9003T	p.W3001C	missense	.	VUS	PM2,PP2,PP3,BP1	.	.
TTN	NM_001256850	exon46	c.12412_12414del	p.4138_4138del	nonframeshift deletion	.	VUS	PM2,PM4	.	.
TTN	NM_001256850	exon46	c.13137_13138del	p.K4379fs	frameshift deletion	.	LP	PVS1,PM2	.	.
TTN	NM_001256850	exon47	c.G13190A	p.G4397D	missense	8.865e-05	LB	PM2,PP2,PP3,BP1,BP6	699499	Conflicting interpretations of pathogenicity
TTN	NM_001256850	exon54	c.G15440C	p.G5147A	missense	9.5e-05	VUS	PM2,PP2,PP3,BP1	626695	Conflicting interpretations of pathogenicity
TTN	NM_001256850	exon81	c.G23077A	p.G7693S	missense	.	VUS	PM2,PP2,PP3,BP1	.	.
TTN	NM_001256850	exon88	c.G25193A	p.C8398Y	missense	6.441e-05	VUS	PM2,PP2,PP3,BP1	229405	Conflicting interpretations of pathogenicity
TTN	NM_133379	exon46	c.C12949T	p.Q4317X	stop-gain	1.2e-05	VUS	PVS1,PM2,PP3	.	.
TTN	NM_133379	exon46	c.C16135T	p.P5379S	missense	4.829e-05	VUS	PM2,PP2,PP3,BP1	978754	VUS
TTN	NM_133437	exon44	c.10741+1G>C	.	splicing	1.662e-05	LP	PVS1,PM2	.	.
TTN	NM_133437	exon44	c.G10306T	p.E3436X	stop-gain	2.011e-05	LP	PVS1,PM2	.	.
TTN	NM_133437	exon44	c.G10327T	p.E3443X	stop-gain	7.24e-05	P	PVS1,PM2,PP3	466777	VUS
One TTN variant (NM_133379:exon46:c.C12949T:p.Q4317X) was predicted to be VUS since it affects only the Novex-3 isoform. Bold PMID represents the paper focused on the HTx patients. ACMG/AMP, American College of Medical Genetics and Genomics and the Association for Molecular Pathology; ACTC1, actin alpha cardiac muscle 1; ACTN2, actinin alpha 2; B, benign; BAG3, BAG cochaperone 3; DCM, dilated car…

## Sheet: Table S4
Table S4 The clinical characterization of DCM in relation to P/LP variant status.
Characteristics	General (n=208)	P/LP-positive (n=85)	P/LP-negative (n=123)	P	TTN （n=40）	FLNC（n=18）	LMNA（n=8）	BAG3（n=4）
Sex, n (%)				0.659
Male	167 (80.3)	67 (78.8)	100 (81.3)		37 (92.5)	12 (66.7)	5 (62.5)	4 (100)
Female	41 (19.7)	18 (21.2)	23 (18.7)		3 (7.5)	6 (33.3)	3 (37.5)	0 (0)
Height (cm)	170.2 ± 7.8	169.6 ± 8.5	170.7 ± 7.2	0.342	168.6 ± 8.9	168.6 ± 8.9	167.4 ± 8.2	173.8 ± 4.8
Weight (kg)	63.5 ± 12.0	63.1 ± 11.4	63.8 ± 12.5	0.673	65.4 ± 11.6	62.6 ± 12.6	58.0 ± 12.5	67.3 ± 6.0
BMI (kg/m2)	21.8 ± 3.4	21.9 ± 3.3	21.8 ± 3.5	0.919	22.6 ± 3.0	21.9 ± 3.9	20.8 ± 4.3	22.3 ± 2.1
NTpro-BNP (×103 ng/L)	2.8 ± 2.2	3.0 ± 2.1	2.7 ± 2.2	0.292	3.2 ± 2.5	2.6 ± 1.6	4.1 ± 2.2	2.2 ± 1.0
Age of onset (years old)	36.5 ± 11.8	35.9 ± 11.6	37.0 ± 11.9	0.517	36.9 ± 12.1	35.3 ± 10.9	37.8 ± 9.2	44.3 ± 11.4
Age of transplantation (years old)	42.4 ± 13.2	41.5 ± 13.1	43.1 ± 13.3	0.401	42.7 ± 13.7	41.9 ± 12.5	43.4 ± 9.8	47.8 ± 12.0
Disease course (month)	71.6 ± 65.6	67.4 ± 45.1	74.6 ± 76.7	0.437	70.1 ± 40.1	78.3 ± 56.8	66.8 ± 44.6	42.0 ± 25.0
Family history, n (%)	18 (8.7)	8 (9.4)	10 (8.1)	0.747	2 (5.0)	1 (5.6)	1 (12.5)	1 (25.0)
AF, n (%)	58 (27.9)	26 (30.6)	32 (26.0)	0.47	16 (40.0)	4 (22.2)	5 (62.5)	0 (0)
Pacemaker, n (%)	40 (19.2)	14 (16.5)	26 (21.1)	0.401	3 (7.5)	4 (22.2)	5 (62.5)*	0 (0)
Diabetes, n (%)	14 (6.7)	7 (8.2)	7 (5.7)	0.472	5 (12.5)	2 (11.1)	0 (0)	1 (25.0)
Echocardiography
LAD (mm)	49.7 ± 8.8	51.0 ± 8.9	48.9 ± 8.7	0.09	52.1 ± 9.2*	50.0 ± 8.4	47.8 ± 8.6	49.3 ± 5.7
LVEDD (mm)	75.7 ± 10.8	74.2 ± 9.7	76.7 ±11.3	0.102	74.1 ± 8.5	77.8 ± 9.1	65.0 ± 6.6**	78.5 ± 5.7
LVEF (%)	23.9 ± 6.4	23.4 ± 5.9	24.2 ± 6.8	0.359	24.2 ± 6.7	21.8 ± 5.0	24.6 ± 6.6	23.0 ± 1.6
IVS (mm)	8.5 ± 1.4	8.5 ± 1.3	8.5 ± 1.5	0.842	8.4 ± 1.2	8.2 ± 1.5	8.5 ± 1.1	8.5 ± 1.3
RVD (mm)	27.0 ± 5.9	26.7 ± 5.8	27.1 ± 5.9	0.58	26.5 ± 4.5	25.1 ± 4.4	27.8 ± 11.4	25.0 ± 3.7
NYHA scale, n (%)				0.066
NYHA class Ⅲ	61 (29.3)	19 (22.4)	42 (34.1)		9 (22.5)	2 (11.1)*	3 (37.5)	1 (25.0)
NYHA class Ⅳ	147 (70.7)	66 (77.6)	81 (65.9)		31 (77.5)	16 (88.9)*	5 (62.5)	3 (75.0)
Continuous variables are expressed as the mean ± SD values, and all categorical variables are depicted using relative frequency distributions. Disease course: months from symptom onset to heart transplantation. AF, atrial fibrillation; BAG3, BAG cochaperone 3; BMI, body mass index; DCM, Dilated cardiomyopathy; FLNC, filamin C; IVS, interventricular septum; LAD, left atrial diameter; LMNA, lamin A…

## Sheet: Table S5
Table S5 Clinical characterization of DCM in patients with one P/LP variant and those with more than one P/LP variant.
Characteristics	P/LP-positive (n=85)	DCM with one P/LP variant (n=79)	DCM with more than one P/LP variant (n=6)	P
Sex, n (%)				0.334
Male	67 (78.8)	61 (77.2)	6 (100)
Female	18 (21.2)	18 (22.8)	0 (0)
Height (cm)	169.6 ± 8.5	172.8 ± 8.4	169.4 ± 8.5	0.34
Weight (kg)	63.1 ± 11.4	63.0 ± 11.6	65.3 ± 9.5	0.625
BMI (kg/m2)	21.9 ± 3.3	21.9 ± 3.3	22.0 ± 2.9	0.921
NTpro-BNP (×103 ng/L)	3.0 ± 2.1	3.1 ± 2.1	2.3 ± 1.0	0.368
Age of onset (years old)	35.9 ± 11.6	36.3 ± 11.5	30.3 ± 12.6	0.227
Age of transplantation (years old)	41.5 ± 13.1	42.1 ± 12.8	34.0 ± 15.7	0.147
Disease course (month)	67.4 ± 45.1	69.1 ± 45.3	44.8 ± 38.9	0.206
Family history, n (%)	8 (9.4)	7 (8.9)	1 (16.7)	0.458
AF, n (%)	26 (30.6)	25 (31.6)	1 (16.7)	0.662
Pacemaker, n (%)	14 (16.5)	12 (15.2)	2 (33.3)	0.256
Diabetes, n (%)	7 (8.2)	6 (7.6)	1 (16.7)	0.413
Echocardiography
LAD (mm)	51.0 ± 8.9	51.0 ± 9.1	50.7 ± 4.9	0.933
LVEDD (mm)	74.2 ± 9.7	73.7 ± 9.1	81.0 ±15.0	0.074
LVEF (%)	23.4 ± 5.9	23.5 ± 6.0	21.5 ± 4.7	0.422
IVS (mm)	8.5 ± 1.3	8.5 ± 1.3	8.5 ± 1.5	0.982
RVD (mm)	26.7 ± 5.8	26.7 ± 5.8	26.3 ± 6.7	0.88
NYHA scale, n (%)				1
NYHA class Ⅲ	19 (22.4)	18 (22.8)	1 (16.7)
NYHA class Ⅳ	66 (77.6)	61 (77.2)	5 (83.3)
Continuous variables are expressed as the mean ± SD values, and all categorical variables are depicted using relative frequency distributions. Disease course: months from symptom onset to heart transplantation. AF, atrial fibrillation; BMI, body mass index; DCM, dilated cardiomyopathy; IVS, interventricular septum; LAD, left atrial diameter; LP, likely pathogenic; LVEDD, left ventricular end-dias…
